# Supplementary material for: Crystal structure of 3,4a,7,7,10a-penta­methyl-3-vinyl­dodeca­hydro-1H-benzo[f]chromen-9-ol isolated from Sideritis perfoliata
Source: PubMed Central journal article supplement (PMC5050758; doi:10.1107/s2056989016013864), 2016-09-05
Supplement: e-72-01380-sup3.pdf [file e-72-01380-sup3.pdf]

**Table S1.** Comparison of experimental (X-ray) and theoretical (PM3) parameters of the title compound.

| Bond (Å)       | X-ray (molecule 1) | X-ray (molecule 2) | PM3    |
|----------------|--------------------|--------------------|--------|
| O1—C3          | 1.436 (3)          | 1.437 (3)          | 1.4165 |
| O2—C11         | 1.447 (4)          | 1.455 (3)          | 1.4364 |
| O2—C17         | 1.440 (4)          | 1.443 (4)          | 1.4335 |
| C1—C6          | 1.555 (3)          | 1.562 (3)          | 1.5511 |
| C1—C12         | 1.564 (4)          | 1.559 (3)          | 1.5628 |
| C1—C2          | 1.534 (4)          | 1.532 (3)          | 1.5419 |
| C1—C13         | 1.546 (4)          | 1.537 (4)          | 1.5368 |
| C4—C5          | 1.533 (4)          | 1.525 (4)          | 1.5403 |
| C5—C7          | 1.541 (5)          | 1.538 (4)          | 1.5331 |
| C5—C8          | 1.534 (4)          | 1.541 (5)          | 1.5332 |
| C5—C6          | 1.549 (4)          | 1.551 (4)          | 1.5612 |
| C10—C11        | 1.520 (4)          | 1.522 (4)          | 1.5387 |
| C11—C12        | 1.540 (4)          | 1.532 (4)          | 1.5518 |
| C11—C14        | 1.530 (4)          | 1.532 (4)          | 1.5377 |
| C16—C17        | 1.530 (5)          | 1.528 (5)          | 1.5432 |
| C17—C19        | 1.511 (6)          | 1.505 (5)          | 1.5490 |
| C17—C18        | 1.532 (6)          | 1.518 (5)          | 1.5389 |
| Bond Angle (°) |                    |                    |        |
| C11—O2—C17     | 119.5 (2)          | 119.1 (2)          | 119.96 |
| C6—C1—C13      | 114.7 (2)          | 114.4 (2)          | 111.40 |
| C12—C1—C13     | 111.6 (2)          | 111.7 (2)          | 104.85 |
| C2—C1—C13      | 108.3 (2)          | 108.8 (2)          | 108.98 |
| C1—C2—C3       | 114.6 (2)          | 114.9 (2)          | 112.84 |
| O1—C3—C2       | 110.0 (2)          | 109.8 (2)          | 106.61 |
| O1—C3—C4       | 111.5 (2)          | 111.2 (2)          | 111.90 |
| C2—C3—C4       | 111.4 (2)          | 111.9 (2)          | 111.19 |

|                    |                  |                  |               |
|--------------------|------------------|------------------|---------------|
| <u>C4—C5—C7</u>    | <u>106.7</u> (2) | <u>110.9</u> (2) | <u>109.07</u> |
| <u>C4—C5—C8</u>    | <u>110.7</u> (2) | <u>106.9</u> (3) | <u>109.03</u> |
| <u>C6—C5—C7</u>    | <u>108.8</u> (2) | <u>114.7</u> (2) | <u>110.24</u> |
| <u>C6—C5—C8</u>    | <u>114.9</u> (2) | <u>108.9</u> (2) | <u>111.87</u> |
| <u>C7—C5—C8</u>    | <u>107.5</u> (2) | <u>107.3</u> (3) | <u>106.23</u> |
| <u>O2—C11—C14</u>  | <u>109.3</u> (2) | <u>109.6</u> (2) | <u>109.58</u> |
| <u>C10—C11—C14</u> | <u>109.5</u> (2) | <u>109.0</u> (2) | <u>110.50</u> |
| <u>C12—C11—C14</u> | <u>116.4</u> (2) | <u>116.8</u> (2) | <u>109.8</u>  |
| <u>O2—C17—C18</u>  | <u>103.5</u> (3) | <u>103.8</u> (3) | <u>103.1</u>  |
| <u>O2—C17—C19</u>  | <u>110.7</u> (3) | <u>110.1</u> (3) | <u>109.5</u>  |
| <u>C16—C17—C18</u> | <u>110.5</u> (3) | <u>110.2</u> (3) | <u>109.8</u>  |
| <u>C16—C17—C19</u> | <u>113.6</u> (4) | <u>114.1</u> (3) | <u>111.12</u> |
| <u>C18—C17—C19</u> | <u>107.4</u> (3) | <u>107.4</u> (3) | <u>109.20</u> |
| <u>C17—C19—C20</u> | <u>128.0</u> (4) | <u>128.2</u> (4) | <u>113.12</u> |
